# Supplementary material
Source: PubMed Central journal article supplement (PMC3943885)
Supplement: NIHMS551475-supplement-1.pdf [file NIHMS551475-supplement-1.pdf]

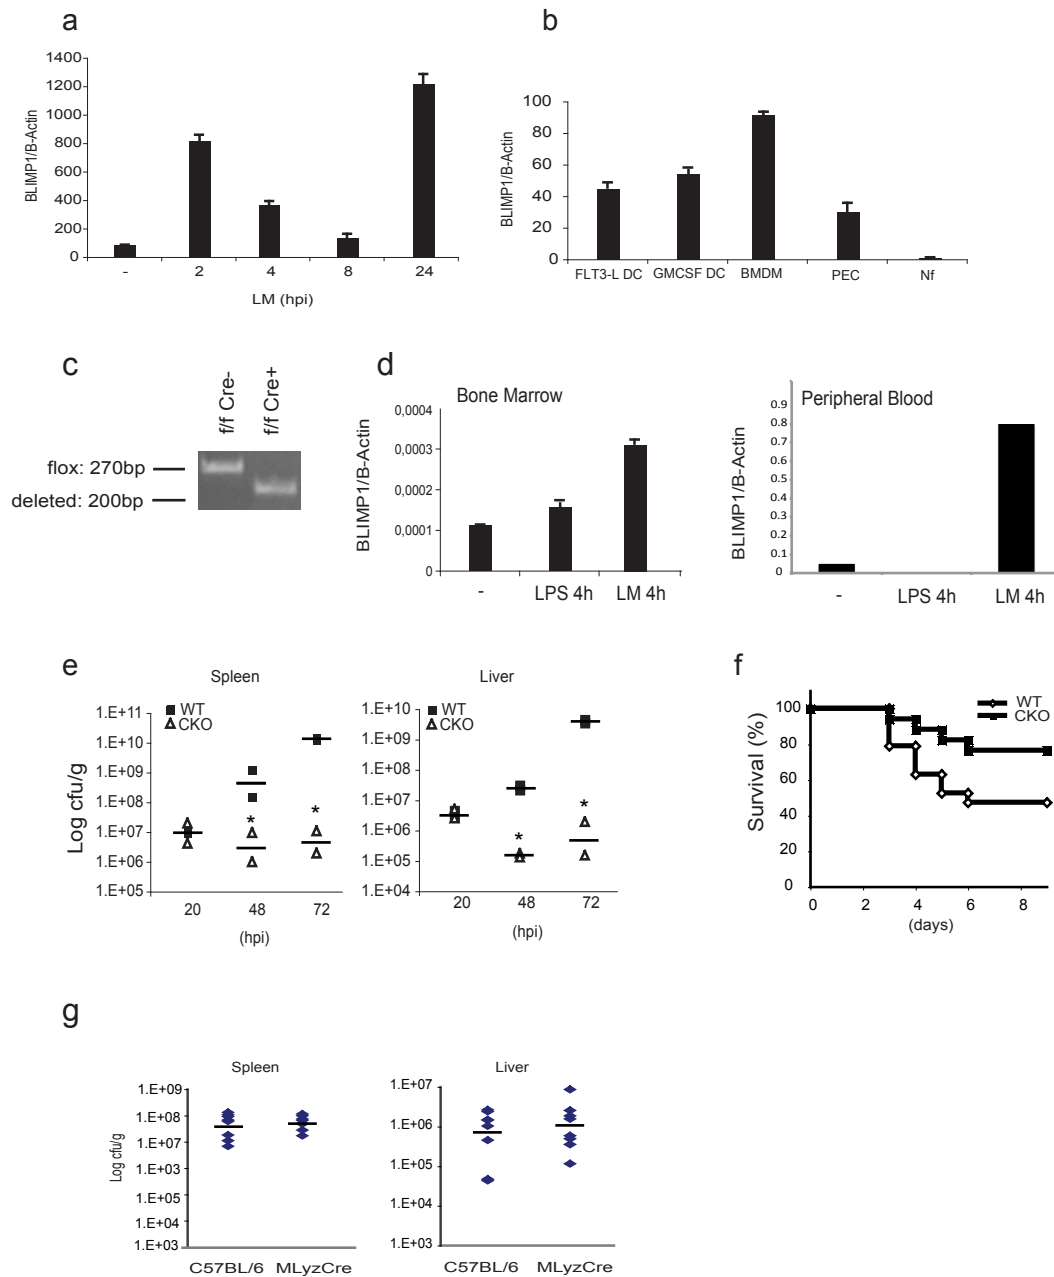

**Supplementary Figure 1. a, Blimp1 expression in *L. monocytogenes*-infected BMDM and Neutrophils.**

RNA was isolated from untreated or Lm-infected BMDM 2, 4, 8 or 24 hpi and Blimp1 gene expression was quantified by qPCR. Data were normalized with  $\beta$ -Actin and are representative of 3 independent experiments.

**b, Blimp1 transcription in different myeloid cell types.** Blimp1 gene expression was monitored in freshly isolated FLT3-L DC, GMCSF DC, BMDM, PEC and neutrophils by qPCR. Data were normalized with  $\beta$ -Actin.

**c, Deletion of Blimp1 in neutrophils derived from Blimp1 CKO mice.** Lysozyme M-driven cre-mediated deletion of Blimp1 was confirmed by PCR in genomic DNA of freshly isolated neutrophils from WT or Blimp1 CKO mice.

**d, Blimp1 expression was monitored by qPCR in neutrophils from bone marrow or peripheral blood left untreated or treated for 4h with LPS or *L. monocytogenes*.** Enhanced protection of myeloid-specific Blimp1-deficient mice to infection with *L. monocytogenes*.

**e, WT or Blimp1 CKO mice were infected i.v. with  $3 \times 10^4$ cfu of *L. monocytogenes* and bacterial loads from livers and spleens were calculated 20, 48 and 72hpi.** Counts from 2 mice per condition are depicted and are representative of two experiments conducted independently. \* $p < 0.05$  (two-tailed Student's t-test).

**f, WT (n=19) or Blimp1 CKO mice (n=17) were infected i.v. with *L. monocytogenes* and survival monitored as indicated.**

**g, C57BL/6 mice and C57BL/6 Mlyz Cre mice (n=10/each genotype) were infected as stated above and bacterial burdens were monitored in infected spleens and livers.**

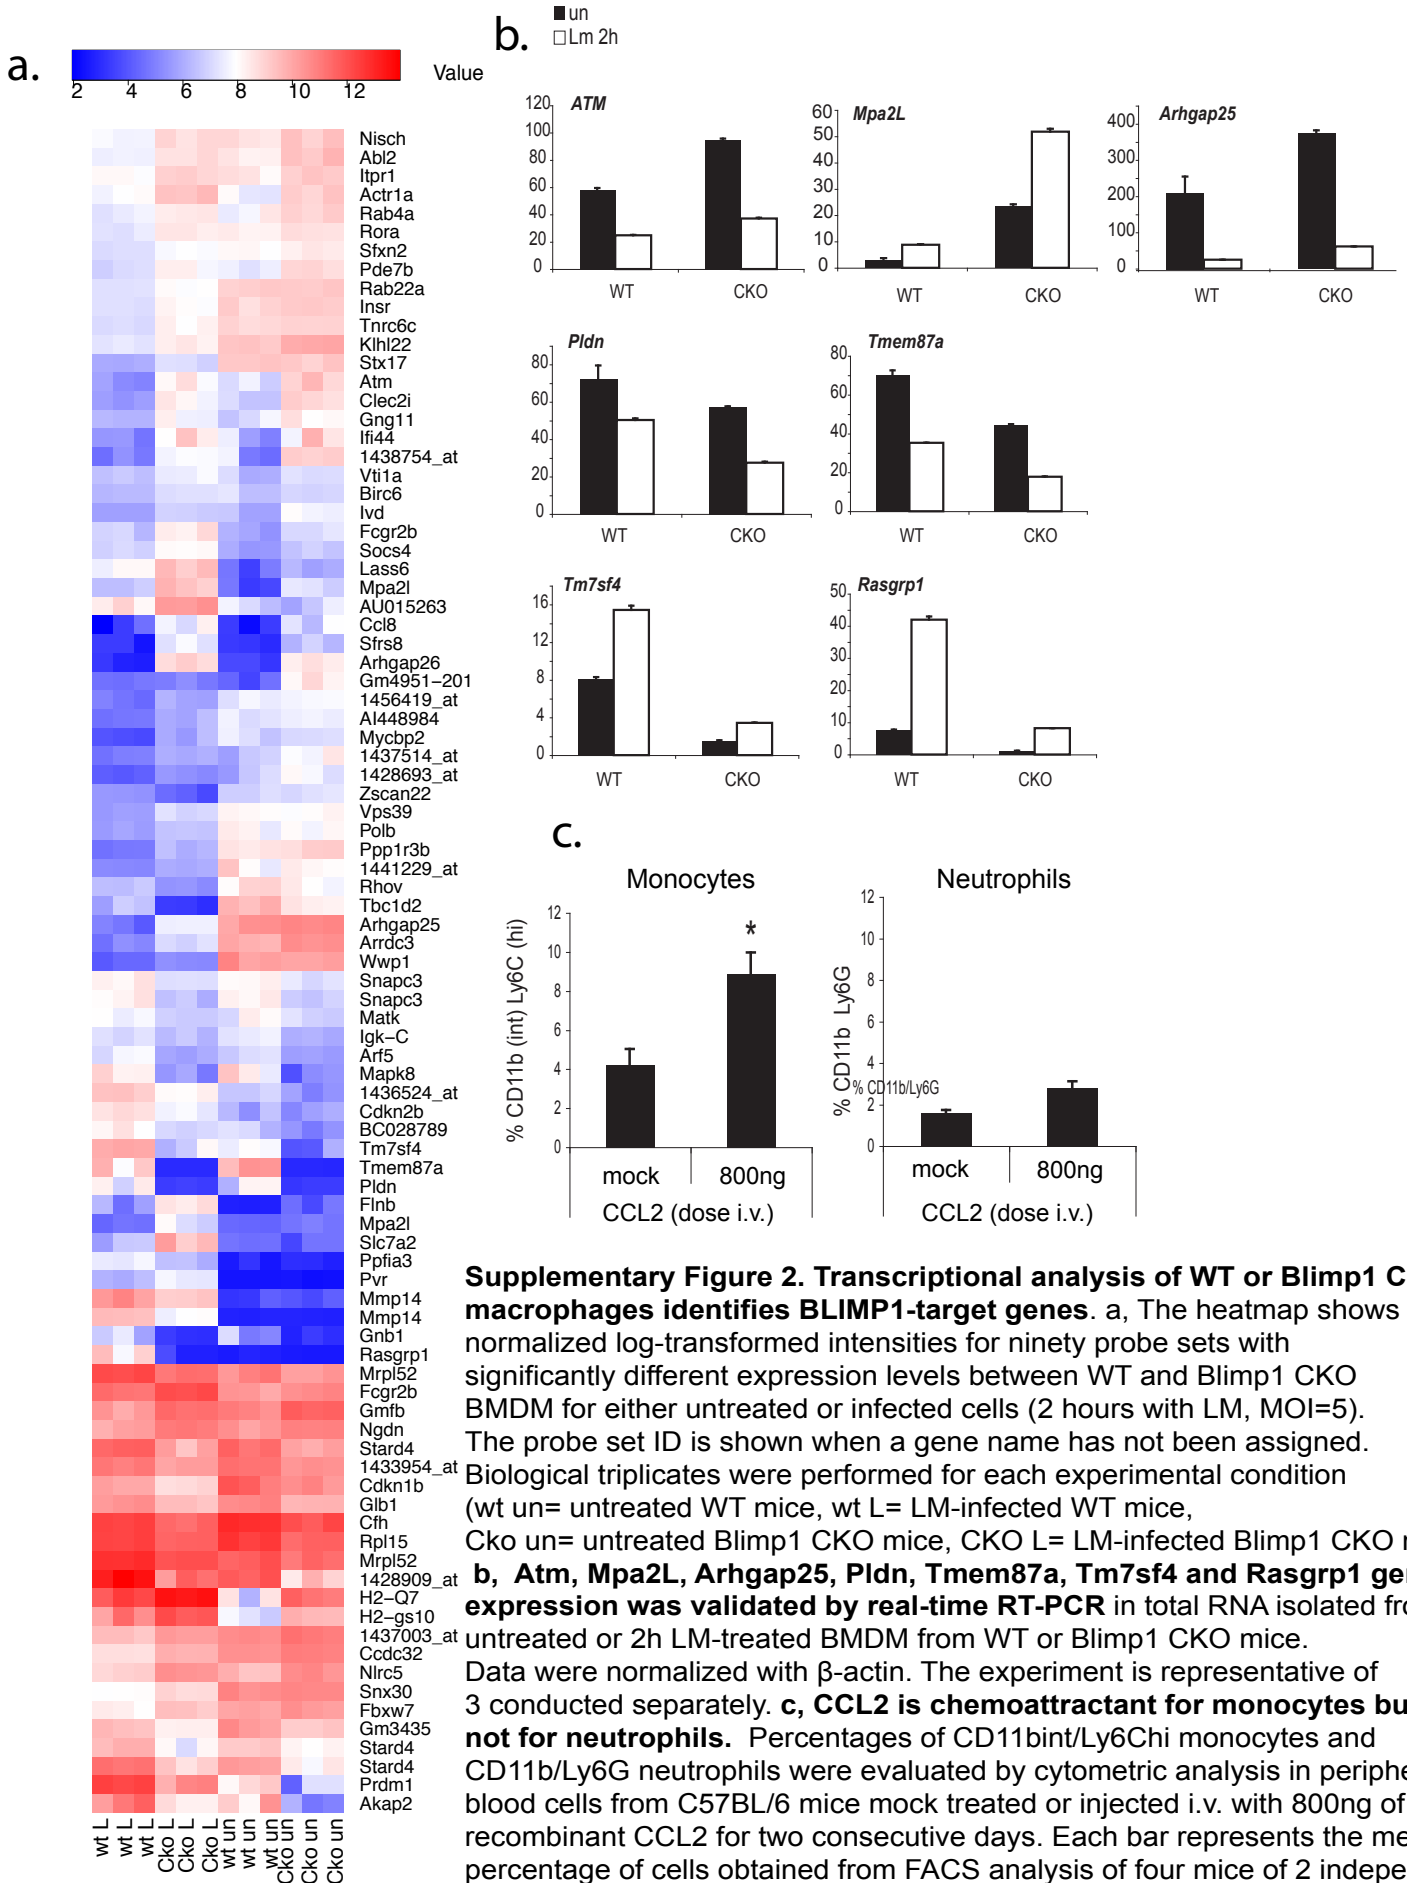

| <b>GO Biological process</b>                                  | <b>Number of genes observed</b> | <b>Expected number of genes</b> | <b>Total number of genes in category</b> | <b>P-value</b> |
|---------------------------------------------------------------|---------------------------------|---------------------------------|------------------------------------------|----------------|
| regulation of macrophage activation                           | 2                               | 0.022854241                     | 5                                        | 0.000203275    |
| regulation of leukocyte activation                            | 5                               | 0.580497715                     | 127                                      | 0.000275194    |
| regulation of cell activation                                 | 5                               | 0.585068563                     | 128                                      | 0.000285395    |
| regulation of cellular process                                | 33                              | 20.71965465                     | 4533                                     | 0.000577988    |
| myeloid leukocyte activation                                  | 3                               | 0.182833926                     | 40                                       | 0.000791349    |
| macrophage activation                                         | 2                               | 0.054850178                     | 12                                       | 0.001314345    |
| leukocyte activation                                          | 6                               | 1.238699848                     | 271                                      | 0.00141389     |
| regulation of biological process                              | 33                              | 21.76180802                     | 4761                                     | 0.001576146    |
| protein ubiquitination                                        | 3                               | 0.2468258                       | 54                                       | 0.001899076    |
| cell activation                                               | 6                               | 1.316404266                     | 288                                      | 0.001926118    |
| negative regulation of apoptosis                              | 5                               | 0.923311326                     | 202                                      | 0.002229077    |
| cytoskeleton organization                                     | 6                               | 1.357541899                     | 297                                      | 0.002248813    |
| biological regulation                                         | 34                              | 23.15591671                     | 5066                                     | 0.002285019    |
| negative regulation of programmed cell death                  | 5                               | 0.941594718                     | 206                                      | 0.002427475    |
| negative regulation of cell death                             | 5                               | 0.941594718                     | 206                                      | 0.002427475    |
| signal transduction                                           | 19                              | 9.918740477                     | 2170                                     | 0.002468391    |
| nitric oxide biosynthetic process                             | 2                               | 0.077704418                     | 17                                       | 0.00266898     |
| nitric oxide metabolic process                                | 2                               | 0.077704418                     | 17                                       | 0.00266898     |
| protein modification by small protein conjugation             | 3                               | 0.283392585                     | 62                                       | 0.002822068    |
| cell communication                                            | 20                              | 11.03402743                     | 2414                                     | 0.003547852    |
| protein modification by small protein conjugation or removal  | 3                               | 0.315388522                     | 69                                       | 0.003822625    |
| immune system process                                         | 9                               | 3.231589639                     | 707                                      | 0.004396854    |
| negative regulation of type I hypersensitivity                | 1                               | 0.004570848                     | 1                                        | 0.004570848    |
| ornithine transport                                           | 1                               | 0.004570848                     | 1                                        | 0.004570848    |
| branchiomotor neuron axon guidance                            | 1                               | 0.004570848                     | 1                                        | 0.004570848    |
| regulation of cytoskeleton organization                       | 3                               | 0.342813611                     | 75                                       | 0.004832623    |
| protein localization                                          | 9                               | 3.359573388                     | 735                                      | 0.005663125    |
| regulation of cellular component organization                 | 5                               | 1.156424581                     | 253                                      | 0.005824961    |
| negative regulation of cell motion                            | 2                               | 0.118842052                     | 26                                       | 0.006212534    |
| regulation of immune system process                           | 5                               | 1.179278822                     | 258                                      | 0.006319439    |
| actin filament organization                                   | 3                               | 0.383951244                     | 84                                       | 0.00662539     |
| actin cytoskeleton organization                               | 4                               | 0.767902489                     | 168                                      | 0.00718126     |
| macromolecule localization                                    | 9                               | 3.524123921                     | 771                                      | 0.007690774    |
| antigen processing and presentation of peptide antigen        | 2                               | 0.141696293                     | 31                                       | 0.008760064    |
| actin filament-based process                                  | 4                               | 0.822752666                     | 180                                      | 0.009113226    |
| production of nitric oxide during acute inflammatory response | 1                               | 0.009141696                     | 2                                        | 0.009121189    |
| JUN phosphorylation                                           | 1                               | 0.009141696                     | 2                                        | 0.009121189    |
| lysine transport                                              | 1                               | 0.009141696                     | 2                                        | 0.009121189    |
| regulation of endocytosis                                     | 2                               | 0.150837989                     | 33                                       | 0.009889142    |

**Supplementary Table1. List of probe set IDs and gene names corresponding to supplementary figure 2.**

| Probe set ID | Gene       |
|--------------|------------|
| 1444128_at   | Arhgap26   |
| 1443905_at   | Sfrs8      |
| 1438676_at   | Mpa2l      |
| 1424454_at   | Tmem87a    |
| 1438754_at   |            |
| 1437072_at   | Arhgap25   |
| 1434295_at   | Rasgrp1    |
| 1437176_at   | Nlrc5      |
| 1429239_a_at | Stard4     |
| 1457088_at   | Pldn       |
| 1416572_at   | Mmp14      |
| 1422166_at   | Clec2l     |
| 1456792_at   | Tbc1d2     |
| 1457970_at   | Actr1a     |
| 1425474_a_at | Vps39      |
| 1421205_at   | Atm        |
| 1449001_at   | Ivd        |
| 1460558_at   | Ccdc32     |
| 1447150_at   | Mycbp2     |
| 1436590_at   | Ppp1r3b    |
| 1457936_at   | Mapk8      |
| 1421275_s_at | Socs4      |
| 1454617_at   | Arrdc3     |
| 1431007_at   | Gm3435     |
| 1455682_at   | Abl2       |
| 1434045_at   | Cdkn1b     |
| 1425908_at   | Gnb1       |
| 1424034_at   | Rora       |
| 1440506_at   | Slc7a2     |
| 1423555_a_at | Ifi44      |
| 1428693_at   |            |
| 1447927_at   | Mpa2l      |
| 1437514_at   |            |
| 1426481_at   | Klhl22     |
| 1442959_at   | Birc6      |
| 1428917_at   | Stx17      |
| 1430151_at   | Nisch      |
| 1424976_at   | Rhov       |
| 1428760_at   | Snapc3     |
| 1439819_at   | AU015263   |
| 1435719_at   | AI448984   |
| 1436524_at   |            |
| 1423903_at   | Pvr        |
| 1460203_at   | Itpr1      |
| 1456479_at   | Snx30      |
| 1445534_at   | Flnb       |
| 1441229_at   |            |
| 1448942_at   | Gng11      |
| 1453077_a_at | Snapc3     |
| 1416205_at   | Glb1       |
| 1439840_at   | Polb       |
| 1460363_at   | Tnrc6c     |
| 1457449_at   | Lass6      |
| 1415761_at   | Mrpl52     |
| 1449048_s_at | Rab4a      |
| 1449168_a_at | Akap2      |
| 1422807_at   | Arf5       |
| 1449152_at   | Cdkn2b     |
| 1455332_x_at | Fcgr2b     |
| 1446365_at   | Vti1a      |
| 1460701_a_at | Mrpl52     |
| 1443628_at   | Wwp1       |
| 1419684_at   | Ccl8       |
| 1442118_at   | Fcgr2b     |
| 1417069_a_at | Gmfb       |
| 1431046_at   | Ppfia3     |
| 1434328_at   | Rpl15      |
| 1433954_at   |            |
| 1420425_at   | Prdm1      |
| 1437003_at   |            |
| 1423153_x_at | Cfh        |
| 1438318_x_at | Ngdn       |
| 1434446_at   | Insr       |
| 1455011_at   | Stard4     |
| 1451558_at   | Fbxw7      |
| 1432329_a_at | Matk       |
| 1428909_at   |            |
| 1454988_s_at | Rab22a     |
| 1431970_at   | Tm7sf4     |
| 1429240_at   | Stard4     |
| 1436360_at   | Zscan22    |
| 1418536_at   | H2-Q7      |
| 1460064_at   | BC028789   |
| 1435896_at   | Sfxn2      |
| 1456419_at   |            |
| 1448383_at   | Mmp14      |
| 1439831_at   | Gm4951-201 |
| 1427660_x_at | Igk-C      |
| 1445539_at   | Pde7b      |
| 1451644_a_at | H2-gs10    |

**Supplementary Table2. GO enrichment analysis for genes with significantly different expression levels ( $p < 0.05$ ).** A GO enrichment analysis was performed on the set of genes in supplementary Table 1. GO biological processes are ordered by P-values obtained from the hypergeometric test.
